# Supplementary material for: Ondansetron Reduces the Incidence of Hypotension after Spinal Anaesthesia: A Systematic Review and Meta-Analysis
Source: Pharmaceuticals (Basel). 2022 Dec 19;15(12):1588. doi: 10.3390/ph15121588 (PMC9787671; doi:10.3390/ph15121588)

Search strategy for Pubmed:

(ondansetron) OR (serotonin antagonist) OR ((“serotonin”[MeSH Terms] OR serotonin[Text Word]) AND antagonist[All Fields]) OR (“Serotonin 5-HT3 Receptor Antagonists”[Mesh]) OR OR (“5-Hydroxytryptamine3”[Mesh])) AND ((“Anesthesia, Spinal”[Mesh]) OR (combined spinal anesthesia) OR ((analgesia OR anesthesia) AND ((spinal OR intrathecal OR subarachnoid)))).

Supplement Figure S1. Forest plot of the pooled analysis showing the subgroup analysis for the incidence of hypotension according to different dosage of ondansetron.

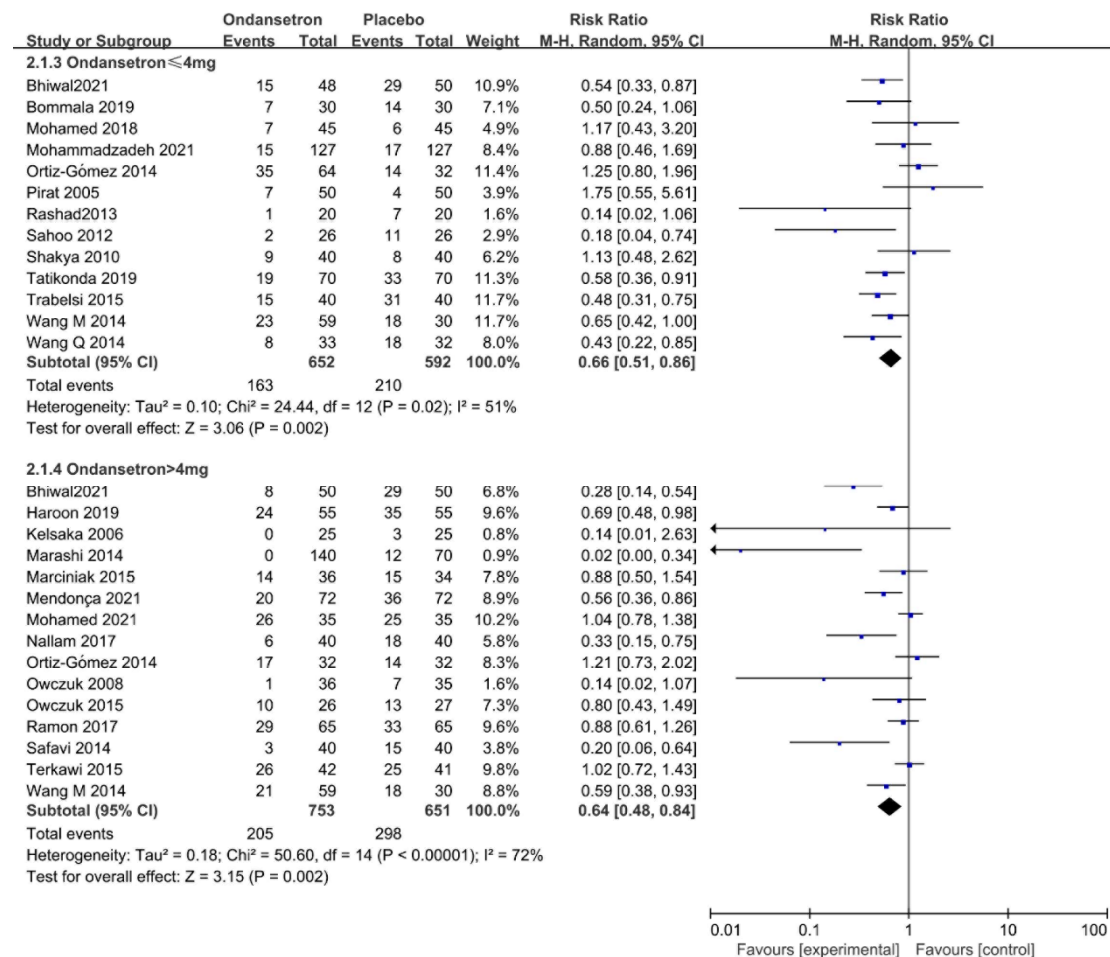

Supplement Figure S2. Forest plot of the pooled analysis showing the subgroup analysis for the incidence of hypotension according to different type of surgical modalities.

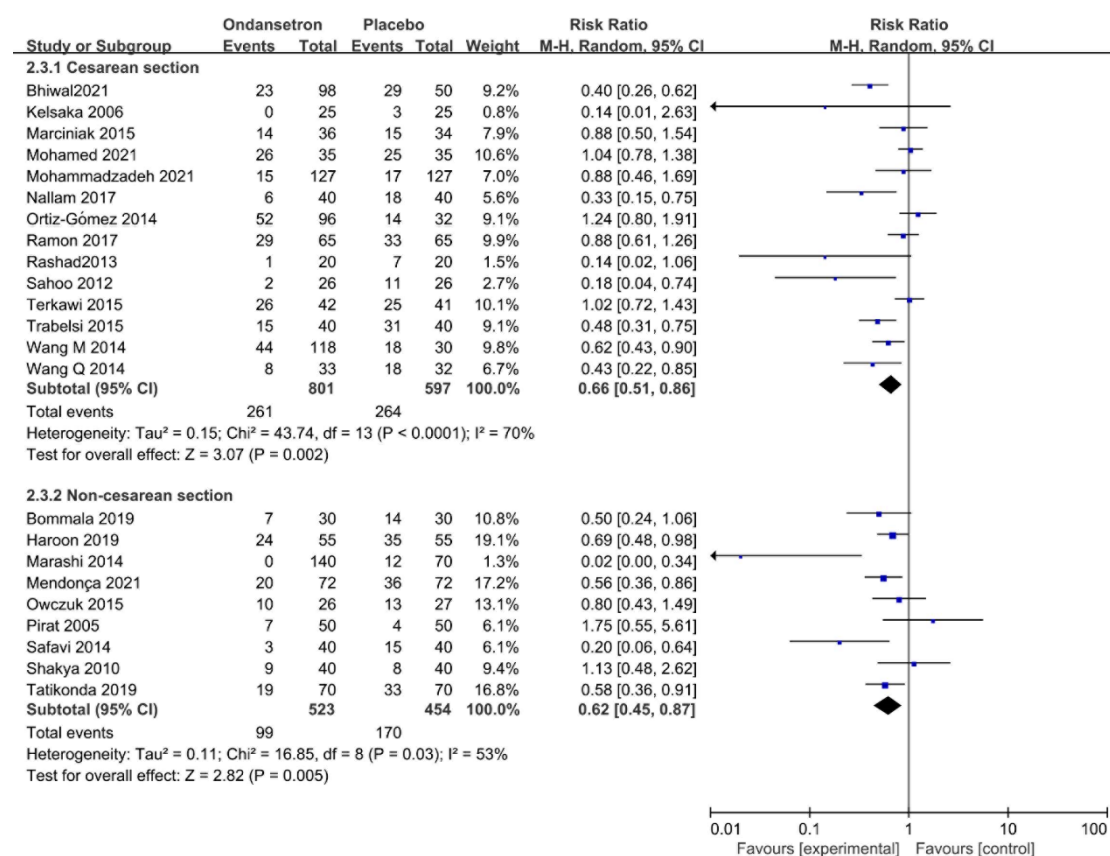

Supplement Figure S3. Sensitivity analysis for the incidence of hypotension.

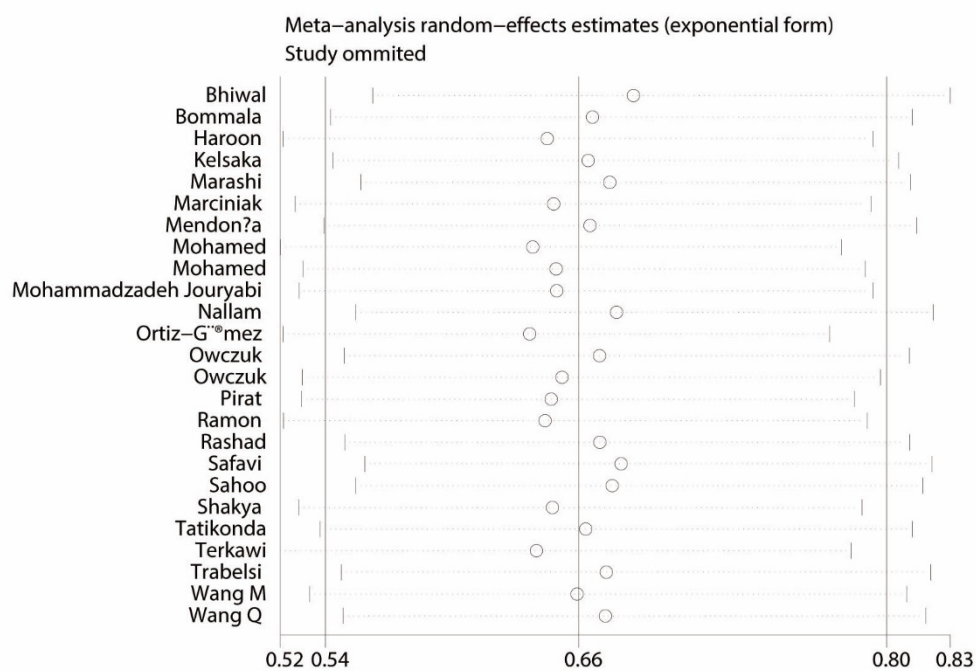

Supplement: Supplementary file 1 [file pharmaceuticals-15-01588-s001.zip › pharmaceuticals-2006873-supplementary.pdf]
